# 1 **Surprise About Sensory Event Timing Drives Cortical** 2 **Transients in the Beta Frequency Band**

3  
4 T. Meindertsma<sup>1,2,3</sup>, N.A. Kloosterman<sup>2,3,4</sup>, A.K. Engel<sup>1</sup>, E.J. Wagenmakers<sup>2</sup>, T.H.  
5 Donner<sup>1,2,3</sup>

6  
7 <sup>1</sup>*Department of Neurophysiology and Pathophysiology, University Medical Center Hamburg-Eppendorf,*  
8 *Hamburg, Germany;* <sup>2</sup>*Department of Psychology,* <sup>3</sup>*Amsterdam Brain and Cognition, University of*  
9 *Amsterdam, Amsterdam, Netherlands;* <sup>4</sup>*Max Planck UCL Centre for Computational Psychiatry and*  
10 *Ageing Research, Max Planck Institute for Human Development, Berlin, Germany*

## 11 12 13 **Address for correspondence:**

14 Thomas Meindertsma  
15 Dept. of Psychology  
16 University of Amsterdam  
17 Nieuwe Achtergracht 129B, 1018 WS Amsterdam, The Netherlands  
18 Email: t.meindertsma@uva.nl  
19 t.donner@uke.de  
20

## 21 **Author contributions:**

22 Conceptualization, T.M., N.A.K., E.J.W. and T.H.D.; Investigation, T.M.; Formal  
23 analysis T.M.; Analytic tools, E.J.W. and N.A.K.; Writing - Original draft, T.M. and  
24 T.H.D.; Writing - Review & Editing, T.M., N.A.K., A.K.E., E.J.W. and T.H.D.; Funding  
25 Acquisition, A.K.E. and T.H.D.; Supervision, T.H.D.  
26

27 **Number of pages: 20**

28 **Number of figures: 5**

29 **Number of tables/multimedia/3D models: 0**

30 **Number of words Abstract: 250**

31 **Number of words Introduction: 119**

32 **Number of words Discussion: 1311**  
33

34 **Conflict of Interest:** The authors declare no competing financial interests.  
35

36 **Acknowledgements:** This work was supported by the Netherlands Organization for  
37 Scientific Research (NWO, dossiernummer 406-14-016, to T.H.D. and T.M.); the  
38 Amsterdam Brain and Cognition priority program (ABC2014-01, to T.H.D.); the  
39 European Union Seventh Framework Programme (FP7/2007-2013) under grant  
40 agreement no. 604102 (Human Brain Project) (to T.H.D. and A.K.E.); and the  
41 German Research Foundation (DFG): Heisenberg Professorship DO 1240/3-1 (to  
42 T.H.D.), the Collaborative Research Centers SFB 936 (Projects A2/A3, A7, to A.K.E.,  
43 T.H.D.) and TRR 169 (Project B1 to A.K.E.). We thank all members of the Donner lab  
44 for helpful discussion.

45 **Abstract**

46 Understanding the statistical structure of the environment is crucial for adaptive  
47 behavior. Humans and non-human decision-makers seem to track such structure  
48 through a process of probabilistic inference, which enables predictions about  
49 behaviorally relevant events. Deviations from such predictions cause surprise, which  
50 in turn helps improve the inference. Surprise about the timing of behaviorally  
51 relevant sensory events drives phasic responses of neuromodulatory brainstem  
52 systems, which project to the cerebral cortex. Here, we developed a computational  
53 model-based magnetoencephalography (MEG) approach for mapping the resulting  
54 cortical transients across space, time, and frequency, in the human brain. We used  
55 a Bayesian updating model to estimate the predicted timing of the next stimulus  
56 change in a simple visual detection task. This model yielded quantitative trial-by-trial  
57 estimates of temporal surprise. The model-based surprise variable predicted trial-  
58 by-trial variations in reaction time more strongly than the externally observable  
59 interval timings alone. Trial-by-trial variations in surprise were negatively correlated  
60 with the power of cortical population activity measured with MEG. This surprise-  
61 related power suppression occurred transiently around the behavioral response,  
62 specifically in the beta frequency band. It peaked in left lateral prefrontal as well as  
63 in frontal midline regions, and its cortical distribution was distinct from the  
64 movement-related suppression of beta power in motor cortex. Our results indicate  
65 that surprise about sensory event timing transiently suppresses ongoing beta-band  
66 oscillations in association cortex. This transient suppression of frontal beta-band  
67 oscillations might reflect an active reset triggered by surprise, and is in line with the  
68 idea that beta-oscillations help maintain cognitive sets.

69

70

71 **Significance statement**

72 Agents continuously track the statistical structure of the environment, in order to  
73 make predictions about behaviorally relevant sensory events. Deviations from such  
74 predictions cause surprise, which in turn drives phasic responses of  
75 neuromodulatory brainstem systems that project to the cerebral cortex. We  
76 developed a computational model-based magnetoencephalography approach,  
77 which enabled us to map out transient changes in cortical population dynamics  
78 elicited by surprise about sensory event timing, across space, time, and frequency,  
79 in the human brain. The model-based estimates of surprise predicted behavior as  
80 well as a transient suppression of beta frequency-band oscillations in frontal cortical  
81 regions. Our results are in line with conceptual accounts that have linked neural  
82 oscillations in the beta-band to the maintenance of cognitive sets.

## 83 Introduction

84 Humans and other organisms continuously adapt their behavior to the statistical  
85 structure of their environment. This suggests that the brain is equipped with  
86 powerful machinery for statistical learning, which can interact with the neural  
87 processes driving goal-directed behavior. Of particular importance here is surprise  
88 (Dayan and Yu, 2006; O'Reilly et al., 2013), a violation of one's expectation about  
89 the next event, which might indicate a sudden change in the environmental  
90 structure, which might transiently boost central arousal state, increasing the  
91 organism's sensitivity and learning rate (Yu and Dayan, 2005; Nassar et al., 2012).

92 Expectation, uncertainty, and surprise are intricately related concepts. The  
93 precision of expectations scales with uncertainty, that is, the width of the  
94 distribution of events: high uncertainty precludes forming precise expectations.  
95 Violations of expectations cause surprise, the level of which depends on the  
96 difference between the expected and actually observed event (often termed  
97 prediction error). These intuitions can be readily formalized within the framework of  
98 Bayesian statistics and used to search for neurophysiological correlates (see  
99 Materials and Methods: *Bayesian model of surprise and uncertainty*).

100 One dimension of environmental statistics that has profound effects on  
101 behavior is the timing of behaviorally relevant sensory events (Gibbon et al., 1997;  
102 Nobre et al., 2007). Two lines of work have studied the neural basis of temporal  
103 expectation effects. One has shown that environments with rhythmic (i.e., precise)  
104 temporal structure entrain neural oscillations in the cerebral cortex, the phase of  
105 which then modulates sensory cortical responses, perception, and cognition  
106 (Lakatos et al., 2008; Schroeder and Lakatos, 2009; Rohenkohl and Nobre, 2011;  
107 Rohenkohl et al., 2012; Riecke et al., 2015; van Ede et al., 2017). Because in these  
108 periodic contexts, surprise is minimized (once the structure is learned expectations  
109 match observations), this work has not identified neural correlates of surprise.

110 Another line of work has instead studied neural responses of subcortical,  
111 neuromodulatory centers (specifically, dopaminergic midbrain) to sensory events  
112 (specifically, rewards). Because event timing here varied non-periodically from trial  
113 to trial as in many natural environments, this work could link phasic  
114 neuromodulatory responses to temporal surprise (Hollerman and Schultz, 1998;  
115 Fiorillo et al., 2008). It is likely that such surprise-driven phasic responses also occur  
116 in other neuromodulatory systems (e.g., the noradrenergic system; Dayan and Yu,  
117 2006) with widespread projections to the cortical networks underlying goal-directed  
118 behavior. But little is known about the cortical responses to surprise about event  
119 timing.

120 Here, we present a computational approach for comprehensively mapping  
121 cortical transients encoding temporal surprise across space, time, and frequency.  
122 We developed a Bayesian learning model that used previous interval durations to  
123 estimate the subjects' belief about the temporal structure of the environment in a  
124 simple detection task. The model output enabled us to compute trial-to-trial  
125 measures of uncertainty and surprise. Correlating these computational quantities to  
126 brain-wide cortical dynamics measured with magnetoencephalography (MEG)  
127 pinpointed clusters in the time-frequency-space domain encoding surprise. This  
128 revealed widespread modulations of cortical dynamics in the beta band (around 20  
129 Hz).

130

## 131 Materials & Methods

132 This paper reports a re-analysis of an MEG data set that has previously been used  
133 for a study into decision-related feedback signals in visual cortex (Meindertsma et  
134 al., 2017). Here, we focus on those aspects of the experimental design that are most

135 relevant for the issue addressed in the current paper: uncertainty and surprise about  
136 the timing of the experimental events specified below. We refer to our previous  
137 paper (Meindertsma et al., 2017) for a more detailed description of the visual  
138 stimulus and the behavioral task.

139

#### 140 *Participants*

141 Thirty-one volunteers participated in the experiment. Two participants were  
142 excluded due to incomplete data and one participant did not complete the  
143 experiment due to poor quality of simultaneously acquired pupil data. Thus, 28  
144 participants (17 female, age range 20 - 54 years, mean age 28.3, SD 9.2) were  
145 included in the analysis. All participants had normal or corrected-to-normal vision  
146 and no known history of neurological disorders. The experiment was conducted in  
147 accordance with the Declaration of Helsinki and approved by the local ethics  
148 committee of the Hamburg Medical Association. Each participant gave written  
149 informed consent.

150

#### 151 *Stimulus*

152 MEG was measured while subjects viewed the intermittent presentation of a target  
153 (full contrast Gabor patch; diameter: 2°) and reported the on- and offset of the target  
154 (Figure 1A). The Gabor patch contained two cycles and flickered at 10 Hz. Target  
155 flicker was implemented by counter-phasing the sinusoid used to generate the  
156 Gabor patch. The target was located in either the lower left or lower right visual  
157 quadrant (eccentricity: 5°, counterbalanced between subjects), surrounded by a  
158 rotating mask (17°x17° grid of black crosses), and superimposed on a gray  
159 background. The mask rotated at a speed of 160°/s. The target was separated from  
160 the mask by a gray “protection zone” subtending about 2° around the target  
161 (Bonneh et al., 2001). Subjects fixated on a fixation mark (red outline, white inside,  
162 0.8° width and length) centered on the mask in the middle of the screen. Stimuli  
163 were presented using the Presentation Software (NeuroBehavioral Systems, Albany,  
164 CA, USA). Stimuli were back-projected on a transparent screen using a Sanyo PLC-  
165 XP51 projector with a resolution of 1024x768 pixels at 60 Hz. Subjects were seated  
166 58 centimeters from the screen in a whole-head magnetoencephalography (MEG)  
167 scanner setup in a dimly lit room.

168

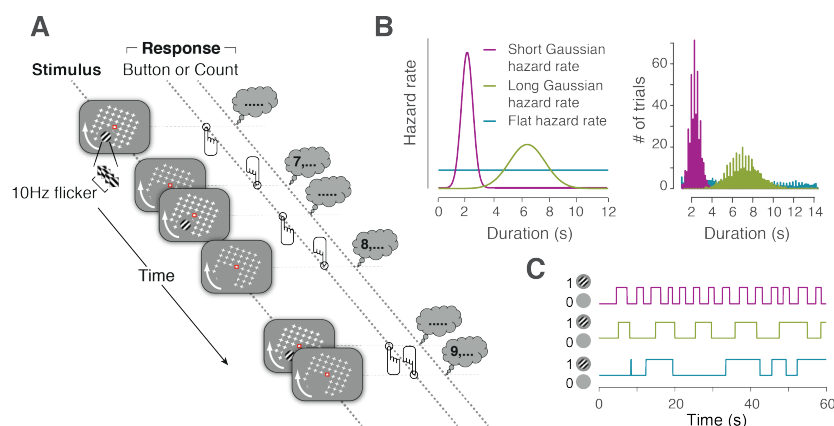

169

170

171 **Figure 1: Behavioral task.** **A.** Schematic depiction of the stimulus and task. A salient, flickering target  
172 (Gabor patch) temporarily appeared and disappeared on a rotating background. Subjects fixated on  
173 the red fixation mark and reported stimulus changes either by direct button press or silently counting  
174 the disappearances and reporting the total number at the end of the run. **B.** The interval duration  
175 between stimulus changes was randomly drawn from one of three distributions that corresponded to  
176 three hazard rates (left), resulting in distinct distributions of intervals (right, average histogram over

177 subjects). **C.** Example time courses of target presence (1 = present, 0 = absent) drawn from these  
178 distributions.

179

### 180 *Behavioral task and experimental design*

181 The subjects' task was to maintain stable fixation and detect the physical offsets  
182 and onsets of the target, the predictability of which fluctuated from trial to trial, and  
183 the mean predictability of which varied systematically across blocks. To this end,  
184 the interval durations between stimulus changes were sampled from three different  
185 distributions in the different blocks. These distributions were computed so as to  
186 produce three predetermined so-called hazard functions, which describe the  
187 probability that an event will occur at a particular time, given that it has not occurred  
188 yet. The hazard function formalizes the expectation of a change and affects human  
189 reaction times in simple detection tasks (Luce, 1986). The hazard function can be  
190 computed as follows:

191

$$192 \quad \lambda_t = \frac{f_t}{1-F_t}, \quad \text{Eq. 1}$$

193

194 where  $\lambda_t$  is the value of the hazard function at time point  $t$ ,  $f_t$  is the value of  
195 distribution  $f$  on time point  $t$ , and  $F_t$  is the area under the curve of distribution  $f$  from  
196  $-\infty$  to time  $t$ .

197 We used the following procedure to construct three conditions, referred to as  
198 'Short', 'Long', and 'Flat' below. We first selected three hazard functions that  
199 systematically differed in their level of predictability (Figure 1B, C). We then  
200 computed the actual distributions of intervals by re-arranging Eq. 1 as follows:

201

$$202 \quad f_t = \lambda_t * (1 - F_t), \quad \text{Eq. 2}$$

203

204 The interval durations were then randomly selected from  $f$ . Specifically, the  
205 conditions were defined as follows:

206 *Short:* The hazard function was a narrow Gaussian distribution with a mean of 2  
207 s and a standard deviation of 0.2 s. This resulted in nearly periodic and, thus, largely  
208 predictable intervals between events.

209 *Long:* This condition used the same hazard function as the previous condition,  
210 but with a larger mean and standard deviation (6 s and 0.6 s, respectively) thus  
211 rendering event timings less predictable (Fiorillo et al., 2008).

212 *Flat:* The hazard function was flat with a mean of 6s, yielding the least  
213 predictable interval durations. The resulting distribution of interval durations,  $f_t$ ,  
214 therefore, approximated an exponential distribution; characterizing a memory-less  
215 process (i.e. the timing of the next event could not be predicted from previously  
216 encountered intervals, Feller, 1959).

217 Computational analysis with a Bayesian model (Fig. 2) described below  
218 confirmed that the sampled intervals from these three conditions gave rise to  
219 different mean levels of uncertainty and surprise (Fig. 2 D, E). The three experimental  
220 conditions were presented in separate blocks, which were divided in three-minute  
221 runs of continuous presentation.

222 Subjects were asked to report the stimulus changes either by button press or  
223 by silently counting the number of target offsets for later report, a manipulation that  
224 was critical for the analyses reported in our previous paper (Meindertsma et al.,  
225 2017). Those two conditions were randomly selected before each run under the  
226 constraint that both would occur equally often. The corresponding instructions were  
227 displayed on the screen before the run started. Subjects could only start the next  
228 run after they confirmed the instructions to the experimenter over the intercom.

229 Here, we focused on the condition entailing immediate behavioral report so as to  
230 study the impact of surprise on RTs and on response-related cortical dynamics.  
231 Subjects reported target offsets and onsets by pressing a button with the index  
232 finger and middle finger of their right hand.

233 All subjects completed a total of 6 runs of the Short condition, and 16 runs of  
234 the other two conditions. Additionally, subjects performed a motion-induced  
235 blindness task and a functional localizer task, which were not relevant for the current  
236 study, but are reported in our previous paper (Meindertsma et al., 2017). The order  
237 of blocks was counter-balanced across subjects.

238

### 239 *Bayesian model of surprise and uncertainty*

240 We developed a Bayesian updating model to quantify surprise and uncertainty  
241 about the timing of sensory events (i.e., the target on- and offsets). The model  
242 tracked the evolving predictive distribution of upcoming interval durations; more  
243 specifically, it computes the posterior predictive of unobserved interval durations,  
244 conditional on the observed data, throughout each block of the experiment. We  
245 assumed that subjects' tracked the temporal statistics of the task in a similar way,  
246 and we used the posterior predictive distribution as a proxy of the subjects' belief  
247 states (i.e., their prediction of the timing of the next stimulus change).

248 We assumed that the subjects used a model in which the observed intervals  
249 have been generated from a gamma distribution with parameters alpha (shape) and  
250 beta (scale). These parameters were given uninformative prior distributions (Lee and  
251 Wagenmakers, 2013), which were updated by the data to posterior distributions.  
252 Then we could obtain the expectations about to-be-observed intervals by  
253 generating posterior predictives (i.e., drawing an alpha-beta pair from the joint  
254 posterior distribution and then drawing a predicted interval from the associated  
255 gamma distribution; repeating this process many times yields a posterior predictive  
256 distribution for the to-be-observed intervals). We assumed that the subjects  
257 updated their belief state after each observation of a new interval duration. Likewise,  
258 the model was updated after every interval  $t$  by computing a new posterior  
259 predictive distribution, based on the durations of intervals  $1:t$  and the prior.

260 We generated posterior predictive distributions over intervals using Gibbs  
261 sampling (a Markov chain Monte Carlo, or MCMC, algorithm (Andrieu et al., 2003) in  
262 the software JAGS (Plummer, 2003) and Matlab (version R2013a). We used two  
263 Markov chains with different starting points of 10,000 samples per chain with 1000  
264 samples burn-in. We transformed the distribution of MCMC samples into a  
265 continuous probability density function by fitting a gamma function to the pooled  
266 distribution of both MCMC chains (Figure 2A,B):

267

$$268 \quad f_t = \text{gamma}(\alpha_t, \beta_t | D_{1:t}), \quad \text{Eq. 3}$$

269

270 where  $f_t$  was the probability density after observing interval  $t$  and  $\alpha_t$  and  $\beta_t$  were the  
271 parameters of the gamma function and  $D_{1:t}$  was the sampled distribution (i.e., the  
272 distribution of MCMC samples).

273 To be able to relate trial-to-trial uncertainty and surprise to behavior and the  
274 MEG data, we extracted two information theoretic metrics from the time-evolving  
275 posterior predictive distribution (i.e., belief)  $f_t$ .

276 *Uncertainty:* We quantified trial-to-trial uncertainty about the timing of the next  
277 interval  $t+1$  as the entropy of the posterior probability distribution:

278

$$279 \quad H_t = - \int_0^\infty (f_t(x) * \log f_t(x)) dx, \quad \text{Eq. 4}$$

280

281 where  $H_t$  was entropy after interval  $t$ ,  $x$  were all possible instances of the probability  
282 function (i.e., interval durations). Entropy depended on the width of  $f_t$ , and thus  
283 uncertainty was higher when predictions of interval durations were less precise  
284 (Figure 2A,C). From here on, we will use the term entropy when referring to  
285 uncertainty, for the sake of mathematical precision.

286 *Surprise:* For every succeeding event  $t+1$ , we computed the surprise about the  
287 corresponding interval duration in terms of the Shannon information conveyed by  
288 the interval duration  $x_{t+1}$ , given the posterior predictive distribution ( $f_t$ ) estimated from  
289 the previous interval (i.e., based on intervals  $1:t$ ):

$$290 \quad 291 \quad 292 \quad I_{t+1} = -\log f_t(x_{t+1}), \quad \text{Eq. 5}$$

293 where  $I_{t+1}$  was the information gained by adding interval  $t+1$ , given  $f_t$ . Thus, surprise  
294 was defined as the negative log-likelihood of the next interval, given the intervals  
295 that had been presented so far, whereby the posterior distribution from the previous  
296 interval  $f_t$  was used as prior distribution  $f_{t+1}$  for the next interval in the updating  
297 process. We added one further transformation in the computation of surprise. The  
298 surprise measures defined in Eq. 5 quantified the surprise about the current event  
299 timing based on the prior distribution estimated from all previous interval durations,  
300 but disregarding the time elapsed on the current trial. It is unlikely that exactly this  
301 distribution translated into subjects' level of surprise: as time passed and no event  
302 occurred on a given trial, all interval durations shorter than the elapsed time became  
303 impossible. Subjects likely discounted these impossible intervals in their expectation  
304 of the timing of the upcoming event, which should have also affected their level of  
305 surprise. In other words, their internal representation of the prior distribution  
306 changed dynamically throughout each trial, as a function of elapsed time. To  
307 capture this process, we constructed a time-varying version of the prior distribution  
308  $f_t$ , which was also conditioned on the elapsed time on trial  $t$ . This version was equal  
309 to  $f_t$  for elapsed time equal to 0 and then increasingly deviated from  $f_t$  as elapsed  
310 time grew. We approximated this time-varying distribution, denoted as  $f'_t$  in the  
311 following, by setting all probabilities in  $f_t$  up to the current time point to zero and  
312 renormalizing the remaining distribution to integrate to 1. We then computed  
313 surprise based on this new distribution  $f'_t$  using Eq. 5. The time-variant prior  $f'_t$   
314 converged to 1 as time passed, and thus surprise approached zero for longer  
315 intervals.

### 316 *Regressing computational variables against behavior*

317 We used reaction time (RT) during Detection-button as behavioral readout of the  
318 impact of uncertainty and surprise. Accuracy approached ceiling for all subjects,  
319 due to the high saliency of the target. We computed and compared mean RTs per  
320 condition and stimulus event (target off- and onset). Furthermore, we assessed the  
321 Pearson correlation between log-transformed single-trial RTs and the trial-to-trial  
322 estimates of surprise or entropy. RT was log-transformed to normalize the (skewed)  
323 distributions of 'raw' RT before computing correlation coefficients. Differences from  
324 zero and differences between conditions were tested using permutation tests over  
325 subjects (two-sided, 10,000 permutations). We tested the difference in magnitude of  
326 the correlation of previous interval of log(RT) compared to surprise and entropy to  
327 log(RT) by testing the difference in absolute value across subjects using permutation  
328 tests (Figure 3C) and computed within subject 95% confidence intervals using  
329 Steiger's correlation test (Zou, 2007).

### 330 *MEG data collection*

333 Magnetoencephalography (MEG) data were acquired on a CTF 275 MEG system  
334 (VSM/CTF Systems, Port Coquitlam, British Columbia, Canada) with a sample rate  
335 of 1200 Hz. The location of the subjects' head was measured in real-time using  
336 three fiducial markers placed in the both ears and on the nasal bridge to control for  
337 excessive movement. Furthermore, electrooculogram (EOG) and electrocardiogram  
338 (ECG) were recorded to aid artifact rejection. All data were recorded in blocks of  
339 four runs of three minutes duration (or two runs at the end of a block), which  
340 corresponded to the runs of experimental conditions defined above.

341

342 *MEG data analysis*

343 *Preprocessing.* The data were analyzed in Matlab (version R2013a, The Mathworks,  
344 Natick, MA, USA) using the Fieldtrip (Oostenveld et al., 2011) toolbox and custom-  
345 made software.

346 *Trial extraction.* In runs involving subjects' reports, we extracted trials of  
347 variable duration, centered on subjects' button presses, from the 3 min runs of  
348 continuous stimulation. We call this method for trial extraction "response-locked".  
349 The following constraints were used to avoid mixing data segments from different  
350 percepts when averaging across trials: (i) The maximum trial duration ranged from  
351  $-1.5$  s to  $1.5$  s relative to report; (ii) when another report occurred within this  
352 interval, the trial was terminated  $0.5$  s from this report; (iii) when two reports  
353 succeeded one another within  $0.5$  s, no trial was defined; (iv) for the analysis of  
354 Detection-button runs, we included only those reports that were preceded by a  
355 physical change of the target stimulus within  $0.2$  to  $1$  s, thus discarding reports not  
356 related to stimulus changes. We used this method for the analyses related to  
357 surprise. In an alternative analysis of all Detection runs, trials were defined in the  
358 same way as described above, but now aligned to physical target on- and offsets  
359 ("stimulus-locked"). In the Detection-count conditions, no button responses were  
360 given during the run, so stimulus-locked trial extraction was the only option. We  
361 used this method for the analysis related to entropy (see Kloosterman et al., 2015b  
362 & Meindertsma et al., 2017 for a similar procedure).

363 *Artifact rejection.* All epochs that contained artifacts caused by  
364 environmental noise, eye-blinks, muscle activity or squid jumps were excluded from  
365 further analysis using standard automatic methods included in the Fieldtrip toolbox.  
366 Epochs that were marked as containing an artifact were discarded after every  
367 artifact detection step. For all artifact detection steps the artifact thresholds were set  
368 individually for all subjects. Both of these choices aimed at optimization of artifact  
369 exclusion. Line-noise was filtered out by subtracting the 50, 100, 150 and 200 Hz  
370 frequency components from the signal.

371 *Time-frequency decomposition.* We used a sliding window Fourier transform  
372 to compute the time-frequency representation for each sensor and each trial of the  
373 MEG data. The sliding window had a length of 200 ms and a step size of 50 ms,  
374 with one Hanning taper (frequency range 5-35 Hz, frequency resolution 2.5 Hz and  
375 bin size 1 Hz). The data was baseline corrected for every frequency bin and MEG  
376 sensor separately. The baseline was computed by averaging single-trial power over  
377 the baseline time window. The baseline time windows ranged from  $-1.25$  to  $-0.75$  s  
378 for response-locked and  $-1$  to  $-0.5$  s for stimulus-locked analyses, respectively. The  
379 time course of every frequency bin and sensor combination was first baseline  
380 corrected by subtracting the single-trial baseline and then normalized by dividing by  
381 the mean over the baselines of all trials within a condition (*Short*, *Long* or *Flat*).

382 *Source reconstruction.* We used an adaptive linear spatial filtering method  
383 called linear beamforming (Van Veen et al., 1997; Gross et al., 2001) to estimate  
384 single-trial modulations of MEG power at the source level. We computed a common



385 filter for a baseline time window (1 to 0.5 s before response), a ‘transient’ time  
386 window, and a frequency band of interest (0 to 0.5 s after response, 20 Hz +/- 4 Hz  
387 spectral smoothing, see dashed box in Figure 4A). The transient time window and  
388 frequency band of interest were selected based on cluster-based statistics at the  
389 sensor level (see next section). We used the measured head positions and individual  
390 single-shell volume conductor models, based on individual images from T1-  
391 weighted structural MRI. We computed the power values, in both baseline and  
392 transient time windows, for each trial and source grid point (i.e., voxel) as follows.  
393 First, we projected the sensor-level MEG power values from the time window of  
394 interest as well as from a baseline time window through the common spatial filter.  
395 Second, we converted the estimated power values during the time window of  
396 interest into units of power modulation, again by subtracting and dividing by the  
397 corresponding baseline power values.

398

399 *Correlating single-trial computational variables to MEG power*

400 We correlated the MEG power modulation to our measures of entropy and surprise,  
401 as derived using our Bayesian model (see *Bayesian model of surprise and*  
402 *uncertainty*) across trials.

403 *Entropy:* We correlated entropy to the MEG power modulation separately in  
404 every MEG sensor and frequency bin. This was done within subject and separately  
405 for the three hazard rate conditions. There are structural differences in entropy and  
406 surprise between these conditions (Figure 2D,E), thus pooling over these conditions  
407 might result in inflated correlations that reflect session differences instead of the true  
408 correlation between entropy and MEG power. We reasoned that entropy should  
409 affect baseline or tonic arousal, where high entropy should cause higher arousal. As  
410 our task was continuous, we considered the time window right before the stimulus  
411 change the best reflection of a baseline state. For this reason we averaged the MEG  
412 power over the time period right before a stimulus change (-0.5 to -0.25s with  
413 respect to the target disappearance or reappearance) before correlating to entropy.

414 The results were then averaged over the three conditions and transformed with  
415 the Fisher z transformation (Fisher, 1915):

416

$$417 \quad z = 0.5 \cdot \ln \left( \frac{1+r}{1-r} \right) \quad \text{Eq. 6}$$

418

419 We used two-tailed permutation tests with a cluster-based correction for  
420 multiple corrections to test the correlation coefficients against zero (Efron and  
421 Tibshirani, 1998; Maris and Oostenveld, 2007).

422 *Surprise:* Correlations between surprise and MEG power modulation were  
423 performed using the same method, with the following exceptions. First, we attuned  
424 the analysis in two ways to account for the correlation between surprise and RT  
425 (Figure 3). Because of this correlation, any post-stimulus correlations between  
426 surprise and MEG power modulation might reflect differences in the timing of the  
427 button press. We performed this analysis response-locked, because these RT  
428 differences are difficult to disentangle from genuine effects of surprise when the  
429 power modulations are time-locked to the stimulus change. Additionally, to account  
430 for confounding effects of RT and the duration of the previous interval, we also  
431 performed a partial correlation analysis between surprise and MEG power  
432 modulation with the interval duration preceding the stimulus change or RT as  
433 covariate. Second, for the correlation between surprise and MEG power modulation  
434 we did not average over a specific time window, but instead performed correlations  
435 separately for every time point, resulting in a 3-dimensional matrix of correlations  
436 (sensor \* frequency bin \* time point). Consequently, we also performed cluster-

437 based permutation statistics over these three dimensions. The correlations that  
438 survived cluster correction were visualized by integrating (i.e. computing the area  
439 under the curve) over sensors and frequency bins (for the time course), sensors and  
440 time points (for the frequency spectrum), frequency bins and time points (for the  
441 topography) or just over sensors for the time frequency representation (see Hipp et  
442 al., 2012 for a similar approach).

443 To assess the robustness of the emerging clusters we performed a cross-  
444 validation analysis using a leave-one-out procedure. To this end, we repeated the  
445 analyses on all possible iterations of N-1 subjects, each time using the resulting  
446 cluster as a mask to calculate the average correlation in the left-out subject,  
447 separately for target offset and onset trials. These values were tested against zero  
448 and against each other across subjects using permutation tests (10.000  
449 permutations).

450 Trial-to-trial surprise, and to a lesser extend entropy, correlated to log(RT)  
451 (Figure 3B). We interpreted this as evidence that our surprise metric indeed captures  
452 a process that is behaviorally relevant to the subjects. From this perspective, we  
453 predicted that the surprise-related MEG cluster was related to RT as well. To test  
454 this hypothesis we computed the correlation between trial-to-trial power modulation  
455 averaged over the whole cluster and log(RT). The resulting correlations were tested  
456 against zero across subjects using a permutation test.

457 The transient modulations of MEG power estimated for each voxel in the source  
458 grid derived by means of source reconstruction (see *MEG data analysis: Source  
459 reconstruction*) was correlated to the trial-to-trial measure of surprise. This was  
460 done separately within each subject and the resulting correlations averaged over  
461 subjects after Fischer's z-transformation (Eq. 6). For comparison, we also computed  
462 the average modulations of MEG power in the same time window and frequency  
463 band. The resulting maps of correlation or average power modulation were  
464 nonlinearly aligned to a template brain (Montreal Neurological Institute) using the  
465 individual images from structural MRI.

466

## 467 **Results**

468 Subjects (N=28) performed a simple visual detection task reporting on- and offsets  
469 of a small, but salient target stimulus (Figure 1A). In different blocks, target events  
470 were administered using three different temporal conditions (Figure 1B,C) translating  
471 into different overall levels of uncertainty and surprise about the timing of target  
472 events (Figure 2D,E). In order to quantify these two computational variables not only  
473 across conditions, but also across individual trials, we developed a Bayesian belief-  
474 updating model. The model approximated subjects' evolving beliefs (i.e. the prior or  
475 posterior predictive distributions in Bayesian terms) about the temporal intervals  
476 between the sensory events, which were dynamically updated across trials and  
477 even within trials (for surprise, see *Materials and Methods*). From these time-  
478 evolving probability distributions, we extracted trial-by-trial measures of information-  
479 theoretic entropy (quantifying uncertainty) and surprise.

480

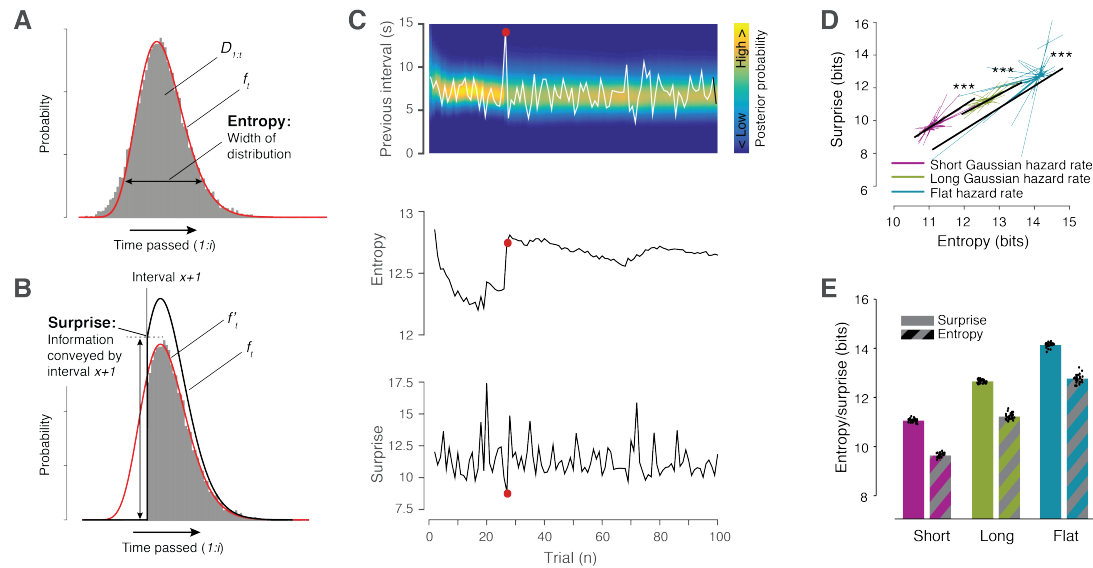

481  
482  
483  
484  
485  
486  
487  
488  
489  
490  
491  
492  
493  
494  
495  
496  
497  
498  
499  
500  
501  
502  
503

**Figure 2: Bayesian updating model of belief about temporal structure A-C.** The model estimated the posterior predictive distribution over timings of stimulus changes for each trial  $t$ . This distribution is denoted as  $f_t$ . The gray histogram shows the frequency distribution of intervals from all trials up to trial  $t$ , denoted as  $D_{1:t}$ .  $f_t$  was estimated by fitting a gamma probability density function (red line) to  $D_{1:t}$ ; it was then used to extract two different information-theoretic computational variables for each trial: entropy and surprise. **A.** Entropy, a measure of the uncertainty about the timing of the interval duration from the current trial, computed from the complete distribution  $f_t$  using Eq. 4 (see main text). The wider the distribution, the higher entropy. **B.** Surprise, a measure of information provided by each new interval duration, was also computed from the posterior predictive distribution, but with one extra step (see main text): the part of the distribution up to the current interval duration was truncated, and the remainder of the distribution re-normalized to integrate to 1 ( $f'_t$ , black line). Surprise was defined based on this truncated function using Eq. 5 (see main text). **C.** Relationship between interval durations (white line in top panel, from the long Gaussian condition), posterior predictive distribution  $f$  (color coded in top panel), entropy (middle), and surprise (bottom). Red dot: exceptionally long interval (see duration in top panel). Surprise on this trial was low (bottom panel) because time dependent surprise decreased over time. After observing this interval entropy increased (middle panel) because the observed interval was longer than the expected duration, given previous intervals. **D.** Regression of surprise on entropy. Thin colored lines, regression lines of single subjects; black lines, group average regression. **E.** Trial-averaged surprise and entropy for the three experimental conditions defined in Fig. 1. Bars, group average; black dots, single subjects. \*\*\*  $p < 0.001$ , permutation tests across subjects.

504  
505  
506  
507  
508  
509  
510  
511  
512  
513  
514  
515  
516  
517  
518  
519

Estimates of entropy and surprise fluctuated across trials, especially in the early part of each block (Figure 2C). The trial averages of both measures within each block also varied lawfully between the different experimental conditions, scaling with the predictability of the stimulus changes (Figure 2D,E). Estimates were smallest for the Short condition, intermediate for the Long condition, and largest for the Flat condition. Further, variations in entropy and surprise were weakly correlated across trials (Figure 2D). This was expected, because both measures draw information from the same posterior predictive distribution. However, despite of this correlation the measures reflected functionally different concepts (uncertainty and surprise) and thus both merited further investigation.

#### Surprise predicts reaction time

The model-derived computational variables entropy and surprise predicted subjects' reaction time (RT) in the detection task (Figure 3). Mean RT scaled with the experimental conditions in the same way as surprise, with the fastest RTs for Short and slowest RTs for the Flat condition (Figure 3A, compare with Figure 2E). In

520 addition, the trial-to-trial variations of surprise within conditions (and in some  
 521 conditions entropy) were correlated to trial-to-trial variations in (log-transformed) RT  
 522 (Figure 3B). For surprise (bottom panel), this correlation was significant for all  
 523 experimental conditions, with the exception of target offsets on the Long condition,  
 524 as well as in the average across conditions. For entropy (top) this correlation was  
 525 only present in the Flat condition, but not the other two. The overall weaker  
 526 correlation for entropy than surprise likely reflected the overall smaller fluctuations of  
 527 entropy as time progressed throughout the blocks (Figure 2C); those fluctuations  
 528 were particularly small during the Short and Long conditions but stronger during  
 529 Flat.

530 We are agnostic to the precise inference process that our subjects used to  
 531 track the temporal structure of the task. Specifically, we do not claim that they  
 532 implemented the exact computations prescribed by the model. But in line with a  
 533 substantial body of evidence from psychology (Sutton and Barto, 1998; Gold and  
 534 Shadlen, 2007; Glaze et al., 2015), we did postulate that subjects integrated, in  
 535 some way, observations throughout each block. Our model implements this by  
 536 integrating across the entire history of the observations (here: of interval durations)  
 537 and updating internal representations accordingly. The surprise and entropy metrics  
 538 correlated to the actual interval durations (white line in Figure 2C), but deviated  
 539 progressively from them as time progressed throughout the block. The assumption  
 540 that subjects also integrated over more than just the previous interval was  
 541 supported by the analysis below.

542 The duration of the interval preceding a stimulus change also correlated to  
 543 RT, with longer interval durations corresponding to faster responses (Figure 3C, left  
 544 panel). However, surprise predicted RT better than previous interval duration,  
 545 reflected by a significant difference between the magnitudes of correlations between  
 546 surprise/previous interval and RT (Figure 3C, '*Difference surprise - prev. inter.*',  
 547 permutation test). This indicates that the correlation between surprise and RT  
 548 reflects subjects' sensitivity to the temporal structure of the task, rather than just  
 549 their growing expectation of a stimulus change as the interval evolves. As for the  
 550 direct correlations between surprise and RT (Figure 3B), these differences were  
 551 significant for all but the target offsets in the Long condition (figure 3D). This  
 552 difference was not observed for entropy (Figure 3C,D).

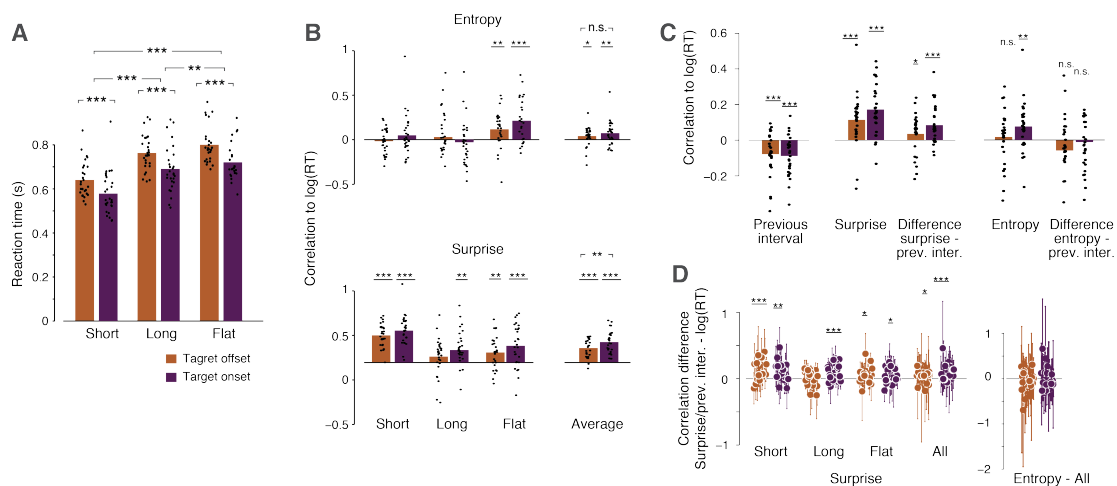

554 **Figure 3: Link between computational variables and behavior.** **A.** Average reaction time (RT) per  
 555 interval distribution, separate for reports of disappearance and reappearance of the target. Bars show  
 556 average over subjects; black dots depict average per subject. **B.** Correlation between log(RT) and  
 557 entropy (top) and surprise (bottom) for each experimental condition. Bars, group average; black dots,  
 558 individual subjects. **C.** Correlation between log(RT) (averaged across conditions) and the interval  
 559 **D.** Correlation difference between Surprise/prev. inter. - log(RT) and Entropy - All for Short, Long, Flat, and All conditions.

561 duration preceding stimulus change, and the difference in correlation magnitude between  
562 surprise/previous interval and RT. Same for entropy. Bars show average over subjects; black dots  
563 depict average per subject. **D.** Difference between magnitude of correlation of surprise and log(RT) and  
564 previous interval duration and log(RT), per condition. Dots depict correlation difference per subject;  
565 error bars show 95% confidence intervals. \*\*\*  $p < 0.001$ , \*\*  $p < 0.01$ , \*  $p < 0.05$ ; n.s., not significant;  
566 permutation tests.

567

568 Taken together, the results from Figure 3 indicate that the surprise variable  
569 derived from the Bayesian model captured variations in behavior. We next searched  
570 the whole-brain MEG data for a dynamical neurophysiological signature of this  
571 process. To this end, we focused on the trial-to-trial fluctuations of surprise within  
572 conditions, which were more pronounced than the differences in mean surprise  
573 between Short, Long, and Flat conditions (recorded in separate MEG runs).

574

#### 575 *Widespread cortical beta-band transient driven by surprise*

576 We mapped out the cortical responses to trial-to-trial fluctuations in surprise by  
577 correlating the model-based surprise measures to modulations of MEG power,  
578 around the time of subjects' behavioral responses to sensory events. We did this in  
579 an exhaustive fashion across every time and frequency bin and MEG sensor and  
580 tested for clusters of significant correlations across these three dimensions, while  
581 applying cluster-based multiple comparison correction (*Materials and Methods*).  
582 This approach revealed negative correlations in the beta (~20 Hz) frequency range,  
583 indicating that higher surprise was associated with lower beta power. This negative  
584 correlation cluster started about 0.2 s before and peaked about 0.25 s after  
585 subjects' report of the stimulus change. This cluster exhibited several peaks over  
586 central, left frontal, and to a lesser extent left parietal cortex (Figure 4A,C).

587

588 The surprise-related cluster was robust and not driven by outliers, and the  
589 effect was not specific to the type of stimulus event (target on- or offset; Figure 5).  
590 To assess these possibilities, we computed the correlation between surprise and  
591 power in the cluster (figure 4A), separately for target offsets and onsets. We found  
592 robust negative correlations for both event types, although the correlations were  
593 somewhat stronger for target onsets (Figure 4D). Furthermore, we used a leave-one-  
594 out cross-validation procedure to test the robustness of the correlations on both  
595 target on- and offsets. Again, the correlation was significantly negative in both cases  
(Figure 4E).

596

597 As expected from previous work on modulations of MEG power around  
598 motor responses (Donner et al., 2009), the overall modulation of MEG power in the  
599 time-frequency window of the cluster (16-24 Hz, 0 – 0.5 s from response) peaked in  
600 bilateral motor cortex (Figure 4B). But the component of beta-power modulations  
601 that correlated with trial-by-trial surprise showed a different cortical distribution, with  
602 negative correlations that peaked in the central sulcus, extending from motor- to  
603 more frontal cortex, and in left frontal and parietal cortex (compare Figure 4B and  
604 4C).

604

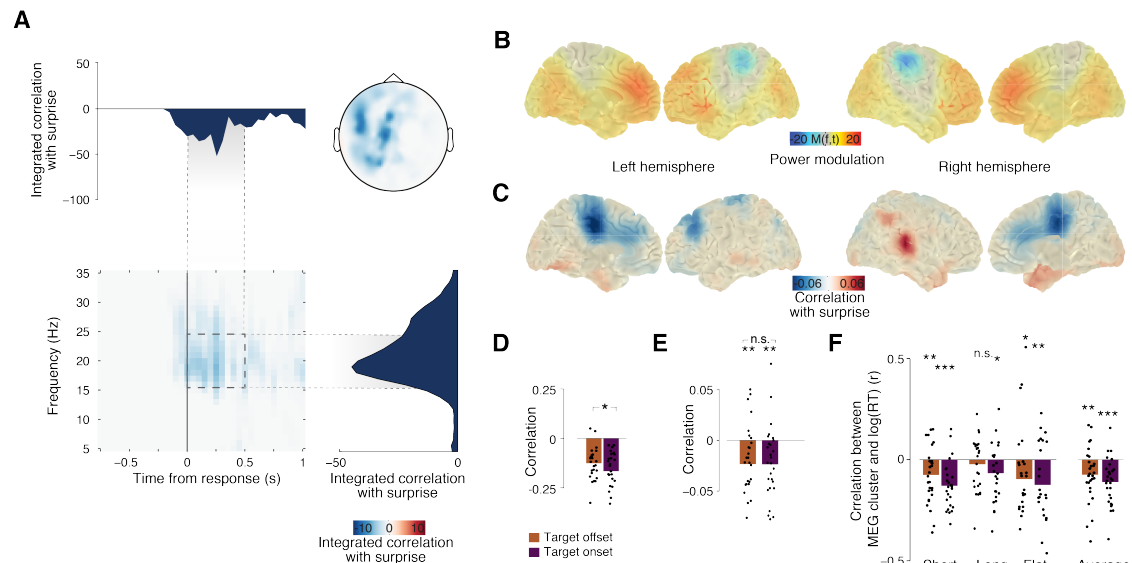

605  
606  
607  
608  
609  
610  
611  
612  
613  
614  
615  
616  
617  
618  
619  
620  
621  
622  
623

**Figure 4: Widespread cortical beta-band transient driven by surprise.** **A.** Exhaustive correlation between trial-to-trial measures of surprise and MEG power modulation in all sensors, time and frequency bins results in one cluster (cluster-based correction for multiple comparison,  $p < 0.05$ , two-sided) of negative correlation. Different panels show different dimensions of the cluster by integrating over the other dimensions; top left: time course, top right: spatial topography, bottom left: time-frequency representation; bottom right: frequency spectrum. **B.** Source reconstruction of the power modulation in the time window in which surprise-MEG correlation was strongest (dashed box in panel A). **C.** Source-reconstructed illustration of the correlation between transient modulation and trial-to-trial surprise depicted in panel B. These source maps are not statistically thresholded, but instead serve for comparing the correlation's spatial distribution with the transient power modulation in panel B. **D.** Comparison of correlation between surprise and power modulation between target offsets and onsets. Correlations are evaluated within the cluster from panel A. **E.** Leave-one-out cross-validation of the cluster found in panel A, separately for target offsets and onsets. Cluster-based permutation was performed on  $N-1$  subjects and the average correlation in the resulting cluster was computed for the remaining subject (black dots); bars show averages over subjects. Correlation values were tested against 0 (permutation test; \*\*  $p < 0.01$ ). **F.** Correlation between MEG power in the cluster and log(RT) for separate distributions and average RT, \*\*\*  $p < 0.001$ , \*\*  $p < 0.01$ , \*  $p < 0.05$ ; permutation tests.

624  
625  
626  
627  
628  
629  
630  
631  
632  
633  
634  
635  
636  
637

The surprise-related cluster for target offsets exhibited a bimodal pattern in both the time and frequency domains: next to the peak around 20 Hz just after response, an additional peak was evident in the lowest frequency bin resolved (5 Hz) around 0.5 s before response. The topography showed peaks over parietal and occipital cortex and over left frontal cortex (Figure 5A). By contrast, the cluster for target onsets exhibited a single peak around 20 Hz just after response (Figure 5B). Taken together, our results suggest that perceptual surprise about both target on- and offsets elicited cortical transients in the beta-band. We consider them general dynamical correlates of temporal surprise monitoring. In addition, target offsets seem to have recruited additional processes expressed in the very low ( $\leq 5$  Hz) frequency range. This latter modulation might have been specific to the experimental context, which entailed monitoring illusory target disappearances in other runs, analyzed in previous reports (Kloosterman et al., 2015b; Meindertsma et al., 2017).

638  
639  
640  
641  
642  
643

Finally, we asked whether the trial-to-trial fluctuations in beta-power modulations also predicted trial-to-trial variations in subjects' (log-transformed) RTs. Here, we used the Pearson correlation values (i.e., without regressing out RT; *Materials and Methods*). Just as surprise, beta-power in the cluster also robustly predicted RT (Figure 4F). These correlations were negative, as expected based on the negative correlation between surprise and beta-power (Figure 4A).

644 We excluded several potential confounding factors in separate correlation  
645 analyses. The negative correlation was present for (i) the ‘raw’ correlation between  
646 surprise and MEG power (data not shown), (ii) the partial correlation including the  
647 interval duration preceding the stimulus change as a covariate (data not shown), as  
648 well as (iii) the partial correlation using RT as a covariate. The latter is the more  
649 conservative measured and shown here.

650  
651

### 652 *No robust correlations between MEG baseline power and entropy*

653 We did not find any evidence for a correlation of the raw baseline (-0.5 to 0 s with  
654 respect to stimulus change) MEG power with uncertainty, as measured in entropy.  
655 Correlations between entropy and MEG power spectra in the time window before  
656 stimulus change did not result in any significant (sensor-frequency) clusters that  
657 survived multiple-comparison correction (data not shown). It is likely that this lack of  
658 robust correlation reflected the continuous reduction in trial-to-trial variations of  
659 entropy over the course of each block (Figure 2C), which also translated into only  
660 minor effects on RT (Figure 3B).  
661

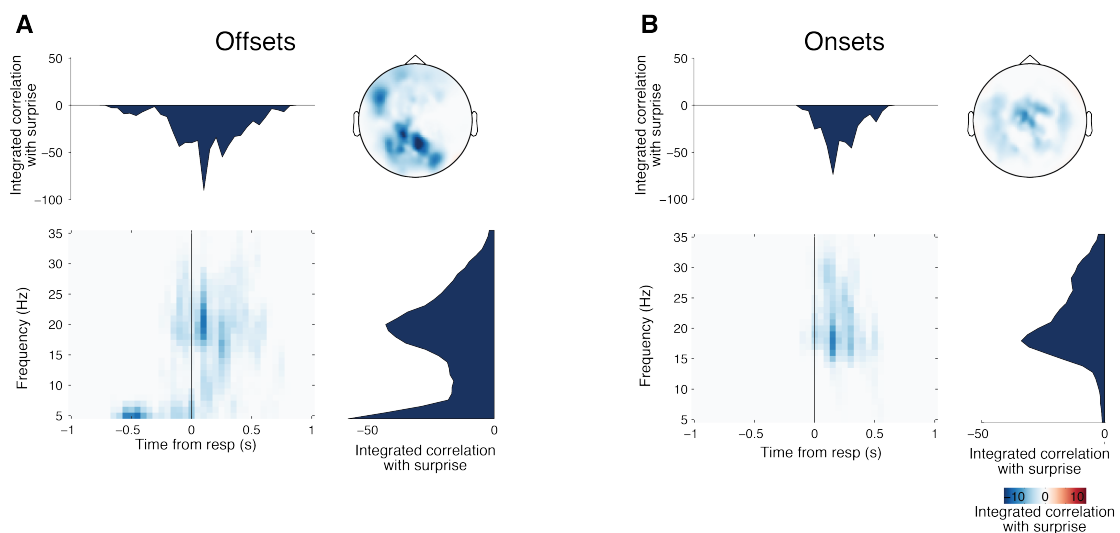

662  
663 **Figure 5: Separate correlations for offsets and onsets.** Correlation analysis and cluster-based  
664 statistics performed separately for target offsets (A) and target onsets (B).  
665  
666

## 667 Discussion

668 In this study, we comprehensively mapped cortical transients elicited by surprise  
669 about the timing of sensory events. We used a Bayesian updating model to estimate  
670 trial-to-trial variations of surprise and correlated these to subjects’ behavior as well  
671 as to neural dynamics, across the cortical surface. The model-derived surprise  
672 estimates robustly predicted across-trial and condition variations in RT. The surprise  
673 estimates also predicted transient suppressions of beta-band power in a  
674 widespread network comprising motor-, prefrontal and parietal cortical regions,  
675 predominantly in the left hemisphere. The model-derived surprise estimates were  
676 more closely related to both behavior and cortical dynamics than the mere trial-to-  
677 trial variations in externally observable interval timings.

678 The signatures of surprise we uncovered in the beta frequency band were  
679 quite similar around target on- and offset (Figure 5). This stands in sharp contrast to  
680 the opposite beta-band modulation during (illusory or veridical) target  
681 disappearances and reappearances, proposed to reflect a decision-related  
682 feedback signal to in visual cortex (Meindertsma et al., 2017). The beta-band

683 transients identified here likely reflected a distinct process that did not encode the  
684 content of the perceptual change, but rather the level of surprise about it.

685 We also measured average pupil responses during the three different  
686 conditions, the results of which were reported previously (Kloosterman et al.,  
687 2015a). This revealed differences in the transient pupil response amplitude for the  
688 three conditions that were in line with encoding surprise. In this study, we did not  
689 find such a relation between pupil size and the trial-to-trial metric of surprise.  
690 Although we here mapped the condition-wise distributions and trial-to-trial  
691 variations of interval timings with the same metric of surprise (Figure 2), it is possible  
692 that these two types of variations recruit separate neural computations. Future work  
693 using more widely spaced intervals to enable reliable trial-by-trial tracking of pupil  
694 response amplitudes is needed in order to better understand the role of pupil-linked  
695 arousal systems (de Gee et al., 2017) in the cortical correlates of the surprise  
696 computations which we have studied here.

697 Temporal expectation has been extensively studied in the context of  
698 temporal difference learning and the activity of the dopaminergic system of the  
699 midbrain (Hollerman and Schultz, 1998). Phasic neural responses in the striatum, as  
700 well as in dopaminergic nuclei, encode not only reward, but also the expected  
701 timing of reward arrival. The strength of these phasic neuronal responses inversely  
702 scales with condition in line with encoding the predictability of the reward timing,  
703 and it also predicted behavioral anticipation reward (i.e. licking behavior) in monkeys  
704 (Fiorillo et al., 2008). Our current study provides a critical complement to this  
705 previous work, by unraveling the cortex-wide dynamics elicited by surprising events.  
706 Our design did not involve rewards but rather neutral, yet behaviorally relevant  
707 sensory events. Still, it is likely that phasic neuromodulatory responses were  
708 nonetheless here driven by temporal expectation and surprise, possibly also in other  
709 systems such as the noradrenaline system (Dayan and Yu, 2006). Phasic  
710 neuromodulator release in cortex is a possible candidate source of the widespread  
711 transient modulations of beta-band activity observed here (Belitski et al., 2008;  
712 Donner and Siegel, 2011).

713 It is tempting to relate our results to conceptual accounts of the functional  
714 role of beta-band oscillations in the brain (Engel and Fries, 2010; Spitzer and  
715 Haegens, 2017). One account (Engel and Fries, 2010) holds that beta-band  
716 oscillations help maintain the current sensorimotor or cognitive state (termed the  
717 'status quo'). Another account (Spitzer and Haegens, 2017) holds that beta-band  
718 oscillations help activate the currently relevant task sets. In both frameworks, the  
719 need for maintaining the current status quo, or task set, is low when surprise (the  
720 violation of expectation, or probability of change in the environment) is high, in line  
721 with our observation of a suppression of beta-band oscillations under high surprise.  
722 Our current results point to the phasic release of neuromodulators, in particular  
723 dopamine, as a mechanistic source of the modulations of ongoing cortical beta-  
724 band oscillations, an idea not explicitly incorporated in either of these proposals so  
725 far.

726 Our current study provides a comprehensive picture of the cortical transients  
727 elicited by surprise, by systematically mapping these transients across the cortical  
728 surface and time-frequency plane. Previous work in humans has also studied neural  
729 correlates of model-derived measures of surprise, although this entailed surprise  
730 about stimulus identity and not timing. Electrophysiological work found surprise  
731 about cue identity to modulate the P3 component of the event-related potential as  
732 well as motor cortical excitability (Bestmann et al., 2008; Mars et al., 2008).  
733 Functional magnetic resonance imaging work linked surprise about the spatial  
734 location of stimuli to transients in posterior parietal cortex (O'Reilly et al., 2013). An  
735 EEG study dissociated oscillatory neural signatures of surprise and evidence



736 accumulation (Gould et al., 2012). This study also found surprise-related modulation  
737 of beta-band power primarily at frontal and parieto-occipital electrodes, but the  
738 underlying cortical distribution was not estimated. Future studies of surprise in other  
739 domains (e.g. about cue identity) should use a similar approach to assess if  
740 surprise-related cortical transients are domain-general or -specific.

741 Some previous work on the P3 component of the electroencephalogram  
742 (EEG) showed that this component is sensitive to the expected timing of events  
743 (Polich et al., 1994; Mertens and Polich, 1997; Polich, 2007). Although we used  
744 more continuous interval distributions that were computed from specific hazard  
745 functions, our task is similar to the ones used in these studies, and would thus likely  
746 induce a P3 response. We did not detect a clear P3-like component in the event-  
747 related fields (data not shown), in line with earlier studies (Schurger et al., 2015). It is  
748 possible that the surprise signature we observed in beta-band is a different  
749 reflection of the same widespread cortical process that also drives the P3. Our  
750 current signal is functionally most closely related to the P3b component, which is  
751 observed in response to the occurrence of attended but rare stimuli (Polich, 2007).  
752 Indeed, the P3b has been proposed to be driven by the phasic release of  
753 noradrenaline in cortex (Nieuwenhuis et al., 2005).

754 Another line of work has investigated the functional role of externally  
755 entrained low-frequency oscillations in temporal expectation. For fixed intervals,  
756 alpha phase in sensory cortices was found to be predictive of expected time of  
757 target arrival and lowered the threshold for sensory detection (Lakatos et al., 2008;  
758 Cravo et al., 2011, 2013; Rohenkohl and Nobre, 2011). Alpha oscillations might  
759 reflect rhythmic fluctuations in cortical excitability, entrained by rhythmic sensory  
760 input, which aids stimulus processing and perceptual performance (Schroeder and  
761 Lakatos, 2009). The high variability in interval durations (see Figure 1B,C inset) might  
762 explain the lack of alpha-band effects in our study. First, the range of possible  
763 durations was too broad to form predictions that fall within a specific phase of an  
764 alpha cycle. Second, even when oscillatory phase was modulated by temporal  
765 expectation in our task, the trial-to-trial variability would make it difficult to align  
766 trials and make these modulations visible.

767 While our current work presents an important first step towards unraveling  
768 the modulation of cortical dynamics by surprise, it is limited in that we only studied  
769 environments with constant statistical structure within each block. Once a posterior  
770 distribution has been learned, there remains no unexpected uncertainty, only  
771 expected uncertainty (Yu and Dayan, 2005). By contrast, the statistical structure of  
772 natural environments is often volatile. Richer experimental designs, that are volatile  
773 and include unmarked changes, allow for probing into richer, presumably  
774 hierarchical dynamics (Sugrue et al., 2004; Nassar et al., 2012; Meyniel et al., 2015).  
775 Our ongoing work aims to push beyond these limits by using richer environmental  
776 statistics that require more complex inference processes.

777 To conclude, we here uncovered a novel signature of temporal surprise that  
778 affected an elementary perceptual decision (target detection) and was characterized  
779 by a temporally focal, but spatially widespread, modulation of cortical population  
780 activity. This modulation might be instrumental in translating inferences about the  
781 behaviorally-relevant temporal structure into its consequences for action.

782

## 783 **References**

- 784 Andrieu C, de Freitas N, Doucet A, Jordan MI (2003) An Introduction to MCMC for  
785 Machine Learning. *Mach Learn* 50:5–43.
- 786 Belitski A, Gretton A, Magri C, Murayama Y, Montemurro MA, Logothetis NK,  
787 Panzeri S (2008) Low-frequency local field potentials and spikes in primary  
788 visual cortex convey independent visual information. *J Neurosci* 28:5696–5709.

- 789 Bestmann S, Harrison LM, Blankenburg F, Mars RB, Haggard P, Friston KJ,  
790 Rothwell JC (2008) Influence of uncertainty and surprise on human  
791 corticospinal excitability during preparation for action. *Curr Biol* 18:775–780.  
792 Bonneh YS, Cooperman A, Sagi D (2001) Motion-induced blindness in normal  
793 observers. *Nature* 411:798–801.  
794 Cravo a. M, Rohenkohl G, Wyart V, Nobre a. C (2011) Endogenous modulation of  
795 low frequency oscillations by temporal expectations. *J Neurophysiol* 106:2964–  
796 2972.  
797 Cravo AM, Rohenkohl G, Wyart V, Nobre AC (2013) Temporal expectation enhances  
798 contrast sensitivity by phase entrainment of low-frequency oscillations in visual  
799 cortex. *J Neurosci* 33:4002–4010.  
800 Dayan P, Yu AJ (2006) Phasic norepinephrine: a neural interrupt signal for  
801 unexpected events. *Network* 17:335–350.  
802 de Gee JW, Colizoli O, Kloosterman NA, Knapen T, Nieuwenhuis S, Donner TH  
803 (2017) Dynamic modulation of decision biases by brainstem arousal systems.  
804 *Elife* 6:e23232.  
805 Donner TH, Siegel M (2011) A framework for local cortical oscillation patterns.  
806 *Trends Cogn Sci* 15:191–199.  
807 Donner TH, Siegel M, Fries P, Engel AK (2009) Buildup of choice-predictive activity  
808 in human motor cortex during perceptual decision making. *Curr Biol* 19:1581–  
809 1585.  
810 Efron B, Tibshirani RJ (1998) *An Introduction to the Bootstrap*. Boca Raton, FL:  
811 Chapman & Hall/CRC Press.  
812 Engel AK, Fries P (2010) Beta-band oscillations-signalling the status quo? *Curr Opin*  
813 *Neurobiol* 20:156–165.  
814 Feller W (1959) *An Introduction to Probability Theory and Its Applications* (Shewhart  
815 WE, Wilks SS, eds)., Second. Wiley Publication in Statistics.  
816 Fiorillo CD, Newsome WT, Schultz W (2008) The temporal precision of reward  
817 prediction in dopamine neurons. *Nat Neurosci* 11:966–973.  
818 Fisher RA (1915) Frequency Distribution of the Values of the Correlation Coefficient  
819 in Samples from an Indefinitely Large Population. *Biometrika* 10:507.  
820 Gibbon J, Malapani C, Dale CL, Gallistel C (1997) Toward a neurobiology of  
821 temporal cognition: advances and challenges. *Curr Opin Neurobiol* 7:170–184.  
822 Glaze CM, Kable JW, Gold JI (2015) Normative evidence accumulation in  
823 unpredictable environments. *Elife* 4:1–27.  
824 Gold JI, Shadlen MN (2007) The neural basis of decision making. *Annu Rev*  
825 *Neurosci* 30:535–574.  
826 Gould IC, Nobre AC, Wyart V, Rushworth MFS (2012) Effects of decision variables  
827 and intraparietal stimulation on sensorimotor oscillatory activity in the human  
828 brain. *J Neurosci* 32:13805–13818.  
829 Gross J, Kujala J, Hamalainen M, Timmermann L, Schnitzler A, Salmelin R (2001)  
830 Dynamic imaging of coherent sources: Studying neural interactions in the  
831 human brain. *Proc Natl Acad Sci U S A* 98:694–699.  
832 Hipp JF, Hawellek DJ, Corbetta M, Siegel M, Engel AK (2012) Large-scale cortical  
833 correlation structure of spontaneous oscillatory activity. *Nat Neurosci* 15:884–  
834 890.  
835 Hollerman JR, Schultz W (1998) Dopamine neurons report an error in the temporal  
836 prediction of reward during learning. *Nat Neurosci* 1:304–309.  
837 Kloosterman N a., Meindertsma T, van Loon AM, Lamme V a. F, Bonneh YS, Donner  
838 TH (2015a) Pupil size tracks perceptual content and surprise. *Eur J Neurosci*  
839 41:1068–1078.  
840 Kloosterman NA, Meindertsma T, Hillebrand A, Van Dijk BW, Lamme VAF, Donner  
841 TH (2015b) Top-down modulation in human visual cortex predicts the stability

- 842 of a perceptual illusion. *J Neurophysiol* 113:1063–1076.
- 843 Lakatos P, Karmos G, Mehta AD, Ulbert I, Schroeder CE (2008) Entrainment of  
844 Neuronal Oscillations as a Mechanism of Attentional Selection. *Science* (80- )  
845 320:110–113.
- 846 Lee MD, Wagenmakers E-J (2013) *Bayesian Cognitive Modeling: A Practical Course*,  
847 1st ed. New York: Cambridge University Press.
- 848 Luce RD (1986) *Response Times: Their Role in Inferring Elementary Mental*  
849 *Organization*, 1st ed. Oxford University Press, USA;
- 850 Maris E, Oostenveld R (2007) Nonparametric statistical testing of EEG- and MEG-  
851 data. *J Neurosci Methods* 164:177–190.
- 852 Mars RB, Debener S, Gladwin TE, Harrison LM, Haggard P, Rothwell JC, Bestmann  
853 S (2008) Trial-by-trial fluctuations in the event-related electroencephalogram  
854 reflect dynamic changes in the degree of surprise. *J Neurosci* 28:12539–12545.
- 855 Meindertsma T, Kloosterman NA, Nolte G, Engel AK, Donner TH (2017) Multiple  
856 Transient Signals in Human Visual Cortex Associated with an Elementary  
857 Decision. *J Neurosci* 37:5744–5757.
- 858 Mertens R, Polich J (1997) P300 from a single-stimulus paradigm: Passive versus  
859 active tasks and stimulus modality. *Electroencephalogr Clin Neurophysiol -*  
860 *Evoked Potentials* 104:488–497.
- 861 Meyniel F, Schlunegger D, Dehaene S (2015) The Sense of Confidence during  
862 Probabilistic Learning: A Normative Account. *PLOS Comput Biol* 11:e1004305.
- 863 Nassar MR, Rumsey KM, Wilson RC, Parikh K, Heasly B, Gold JI (2012) Rational  
864 regulation of learning dynamics by pupil-linked arousal systems. *Nat Neurosci*  
865 15:1040–1046.
- 866 Nieuwenhuis S, Aston-Jones G, Cohen JD (2005) Decision making, the P3, and the  
867 locus coeruleus-norepinephrine system. *Psychol Bull* 131:510–532.
- 868 Nobre A, Correa a., Coull J (2007) The hazards of time. *Curr Opin Neurobiol*  
869 17:465–470.
- 870 O'Reilly JX, Schüffelgen U, Cuell SF, Behrens TEJ, Mars RB, Rushworth MFS (2013)  
871 Dissociable effects of surprise and model update in parietal and anterior  
872 cingulate cortex. *Proc Natl Acad Sci U S A* 110:E3660-9.
- 873 Oostenveld R, Fries P, Maris E, Schoffelen J-M (2011) FieldTrip: Open source  
874 software for advanced analysis of MEG, EEG, and invasive electrophysiological  
875 data. *Comput Intell Neurosci* 2011:156869.
- 876 Plummer M (2003) JAGS: A program for analysis of Bayesian graphical models  
877 using Gibbs sampling. *Proc 3rd Int Work Distrib Stat Comput (DSC 2003):*20–  
878 22.
- 879 Polich J (2007) Updating P300: An integrative theory of P3a and P3b. *Clin*  
880 *Neurophysiol* 118:2128–2148.
- 881 Polich J, Eischen SE, Collins GE (1994) P300 from a single auditory stimulus.  
882 *Electroencephalogr Clin Neurophysiol Evoked Potentials* 92:253–261.
- 883 Riecke L, Sack AT, Schroeder CE (2015) Endogenous Delta/Theta Sound-Brain  
884 Phase Entrainment Accelerates the Buildup of Auditory Streaming. *Curr Biol*  
885 25:3196–3201.
- 886 Rohenkohl G, Cravo AM, Wyart V, Nobre AC (2012) Temporal Expectation Improves  
887 the Quality of Sensory Information. *J Neurosci* 32:8424–8428.
- 888 Rohenkohl G, Nobre a. C (2011) Alpha Oscillations Related to Anticipatory Attention  
889 Follow Temporal Expectations. *J Neurosci* 31:14076–14084.
- 890 Schroeder CE, Lakatos P (2009) Low-frequency neuronal oscillations as instruments  
891 of sensory selection. *Trends Neurosci* 32:9–18.
- 892 Schurger A, Sarigiannidis I, Naccache L, Sitt JD, Dehaene S (2015) Cortical activity  
893 is more stable when sensory stimuli are consciously perceived. *Proc Natl Acad*  
894 *Sci* 112:E2083–E2092.

- 895 Spitzer B, Haegens S (2017) Beyond the Status Quo: A Role for Beta Oscillations in  
896 Endogenous Content (Re-) Activation. *eneuro*:ENEURO.0170-17.2017.  
897 Sugrue LP, Corrado GS, Newsome WT (2004) Matching Behavior and the  
898 Representation of Value in the Parietal Cortex. *Science* (80- ) 304:1782–1788.  
899 Sutton RS, Barto AG (1998) Reinforcement Learning : An Introduction, First.  
900 Cambridge: MIT Press.  
901 van Ede F, Niklaus M, Nobre AC (2017) Temporal Expectations Guide Dynamic  
902 Prioritization in Visual Working Memory through Attenuated  $\alpha$  Oscillations. *J*  
903 *Neurosci* 37:437–445.  
904 Van Veen BD, van Drongelen W, Yuchtman M, Suzuki A (1997) Localization of brain  
905 electrical activity via linearly constrained minimum variance spatial filtering.  
906 *IEEE Trans Biomed Eng* 44:867–880.  
907 Yu AJ, Dayan P (2005) Uncertainty, neuromodulation, and attention. *Neuron* 46:681–  
908 692.  
909 Zou GY (2007) Toward Using Confidence Intervals to Compare Correlations.  
910 *Psychol Methods* 12:399–413.
